# Supplementary material for: The NEOM Brine Pools – The First Discovery in the Gulf of Aqaba
Source: Research Square preprint supplement (doi:10.21203/rs.3.rs-1420638/v1), 2022-03-15
Supplement: Supplementary file 1 [file 183ab8fb869d57a09f158494.xlsx]

## Sheet: Citation
Please cite the following: The NEOM Brine Pools – The First Discovery in the Gulf of Aqaba Sam J. Purkis1,2*, Hannah Shernisky1, Peter K. Swart1, Arash Sharifi1,3, Amanda Oehlert1, Fabio Marchese4, Francesca Benzoni4, Giovanni Chimienti5, Gaëlle Duchâtellier1, James Klaus1, Gregor P. Eberli1, Larry Peterson1, Andrew Craig6, Mattie Rodrigue6, Jürgen Titschack7, Graham Kolodziej8, and Ameer Abdulla…

## Sheet: S1-2 Radiocarbon and U-Th Dates
	Sample ID	Lab ID	Material	Depth mipoint (mm)	Sample Thinckness (mm)	Corrected Depth midpoint (mm)*	14C Age	error	δ13C (‰)	14C Age Corrected for Reservoir Effect**	error	Age Range (2σ) cal. y BP	Median Age cal. y BP			Sample ID	Uncorrected Age (BP)	95% CI	Corrected Age (BP)	95% CI	U ng/g	95% CI	Th ng/g	95% CI	234U/238U Activity Ratio*	95% CI	230Th/238U Activity Ratio*	95% CI	230Th/232Th Activity Ratio*	95% CI
	CHR0017-5-C-1	Beta - 596734	Bulk Sediment	79	8	128	780	30	-19.5	824	39	67-477	285			NTN0061-1-UT-1	529.234	19.4468	470.285	27.3629	5741.65	5.75515	18.1344	0.232551	1.15321	0.00312451	0.00557631	0.000206353	5.35797	0.211538
	CHR0017-5-C-2	Beta - 596735	Bulk Sediment	193	10	312	820	30	-19.4	866	39	111-505	326			NTN0061-1-UT-2	680.682	10.1992	611.49	24.8276	5820.56	7.8	21.5704	0.122096	1.15687	0.00335051	0.00718987	0.000107357	5.88742	0.0934362
	CHR0017-5-C-3	Beta - 596736	Bulk Sediment	289	8	468	1030	30	-19.1	1074	39	316-663	508			NTN0061-1-UT-3	420.224	9.9294	382.624	15.8247	5942.64	7.85267	11.91	0.175466	1.14898	0.00323456	0.00441347	0.000104656	6.68296	0.187014
	CHR0017-5-C-4	Beta - 596737	Bulk Sediment	496.5	9	807	1230	30	-19.2	1274	39	507-871	672			*Measured ratios corrected for acid blank, abundance sensitivity, hydride, and spike contribution. The activity ratios are from Monte Carlo Simulation.
	CHR0017-5-C-5	Beta - 596738	Bulk Sediment	720	8	1170	1550	30	-20.1	1594	39	768-1200	986
	CHR0017-5-C-6	Beta - 595099	Bulk Sediment	820	10	1333	1760	30	-19.1	1804	39	979-1383	1197
	* The original length of core was 135 cm, which was compressed down to 85 cm due to sampling. Corrected depth midpoint is referred to the original length of the core.
	** Local ΔR of -44±74 was used to account for the marine radiocarbon reservoir age corrections.

## Sheet: S3 XRF
		Core Depth (mm)	Element Intensity *
			K	Fe	Rb	Sr	Zr		*Elements' intensity are in count per second (cps)
		0	8183	19475	369	2890	863
		2	6485	18824	299	2826	725
		4	6521	17723	350	2645	740
		6	6480	19499	310	2853	694
		8	6006	18430	313	2593	731
		10	6291	12262	329	1781	847
		12	9017	12062	390	2034	924
		14	10297	17829	474	2655	983
		16	10080	10683	454	1353	585
		18	7239	9637	398	1154	1062
		20	9973	9341	471	1392	669
		22	7556	13712	407	2074	905
		24	6681	17384	440	2745	867
		26	8909	19524	474	3271	833
		28	7087	20128	274	3070	713
		30	8735	32326	233	3218	896
		32	9599	35304	353	2785	1487
		34	9017	31962	361	2950	1744
		36	8399	29277	343	3164	1349
		38	7709	25867	309	3166	1051
		40	7468	30953	219	3930	951
		42	6870	30115	139	4295	702
		44	9532	33120	226	3954	972
		46	10329	29189	390	3336	1147
		48	9903	23574	401	2911	1220
		50	9439	25185	376	2712	1320
		52	9336	25042	313	2994	1006
		54	8749	27538	285	3247	1099
		56	6946	26028	198	3441	779
		58	7273	30392	162	3723	764
		60	7765	30824	221	3664	796
		62	7379	29075	145	3840	732
		64	8096	32029	183	3611	754
		66	9628	36564	197	3691	905
		68	7143	27877	130	2677	735
		70	4658	20491	108	1746	834
		72	8483	36849	166	2251	806
		74	9338	40038	156	2464	706
		76	9548	40717	160	2550	531
		78	9690	41421	157	2655	678
		80	9566	41374	165	2560	693
		82	9267	39131	158	2527	632
		84	10086	40573	203	2809	827
		86	10404	41221	221	3155	1158
		88	8752	33406	186	2751	1050
		90	6179	21858	174	2209	1132
		92	5464	23423	141	1902	538
		94	5276	22251	120	1417	448
		96	4622	19839	106	1419	480
		98	7943	33357	171	2320	699
		100	9291	39173	193	2568	752
		102	9370	39401	182	2466	778
		104	9800	39089	179	2621	829
		106	10496	39354	257	2895	1198
		108	9716	36644	258	3103	1484
		110	9219	40850	193	2738	1427
		112	7693	39032	185	3971	1470
		114	6056	28299	206	3732	821
		116	8038	38913	195	3594	939
		118	12029	48413	339	3397	1524
		120	7027	28553	173	3260	792
		122	8150	34523	203	3588	730
		124	8358	34751	205	3260	825
		126	7400	29728	157	3213	936
		128	5752	27262	214	3901	892
		130	5463	25330	114	3427	754
		132	6414	31540	140	2961	805
		134	8008	41817	154	3218	824
		136	13134	62405	228	2753	1271
		138	13357	54448	289	2801	1498
		140	12018	47382	226	3074	1675
		142	10645	40856	281	3482	1792
		144	9656	34775	284	3639	2181
		146	6878	22377	234	2762	1099
		148	7866	32276	149	3204	862
		150	10481	42876	258	2993	1271
		152	10436	38977	275	3610	1256
		154	7814	29532	201	3761	1098
		156	7725	30227	151	3846	931
		158	14361	38569	431	3624	1734
		160	12370	30162	428	2176	1501
		162	8747	28558	340	1861	1638
		164	11138	34233	385	2308	1728
		166	11986	35473	470	2817	2054
		168	12460	28138	538	3390	2033
		170	10279	18706	519	3165	1029
		172	7648	21762	358	2621	1130
		174	9339	29217	339	2860	1456
		176	9293	28243	301	3134	1507
		178	7897	25827	323	3317	1582
		180	8112	25447	276	3125	1108
		182	6632	27946	158	3443	1018
		184	7691	32059	136	3935	883
		186	7925	33742	180	4003	1094
		188	7317	32318	193	3851	963
		190	7858	32408	209	3969	800
		192	8032	32431	183	3936	728
		194	8070	32023	163	3791	926
		196	9144	36083	158	3735	779
		198	11048	43663	257	3114	1136
		200	10657	42655	295	3094	1396
		202	9637	35094	240	3565	1452
		204	8599	29694	244	3580	1369
		206	8518	27966	246	3737	1075
		208	8052	29224	233	4055	1025
		210	7781	26063	170	3815	763
		212	8097	31783	165	3679	607
		214	9003	33800	175	3337	688
		216	9625	34463	167	3265	683
		218	9358	33505	158	3309	715
		220	9503	32866	171	3526	1058
		222	9669	29895	238	3713	1567
		224	8815	24220	270	3286	1630
		226	8793	25298	244	3517	1769
		228	7619	25155	175	3155	1261
		230	8374	34317	189	3880	801
		232	8953	32917	257	4578	1305
		234	7482	22443	259	2811	2071
		236	5987	21124	190	1898	1938
		238	7990	31705	143	3619	989
		240	8423	32965	196	3952	1268
		242	7239	31902	121	3967	1037
		244	7226	29232	195	4315	1235
		246	6987	29924	173	4459	749
		248	9937	38387	239	3976	1036
		250	8942	35319	292	3658	1438
		252	8518	32588	250	3561	1048
		254	8843	33111	164	4065	908
		256	7647	32445	143	4364	850
		258	10007	35860	179	4089	808
		260	13470	38678	383	3083	1242
		262	14261	45731	411	2030	3122
		264	14681	37289	454	1922	2467
		266	15564	41971	531	2490	2197
		268	11278	25746	536	1820	1496
		270
		272
		274
		276
		278	4035	16398	156	791	527
		280	10207	34687	277	1456	1055
		282	12272	40726	332	1707	1566
		284	11703	39733	306	1999	1952
		286	11072	39048	249	2371	1599
		288	11513	36573	377	2680	1461
		290	12844	31781	444	2387	1792
		292	11296	31564	457	2060	1236
		294	11104	20565	457	1858	1248
		296	8905	12837	471	1343	968
		298	10946	12640	520	1103	860
		300	14652	20007	604	983	1135
		305	11310	8282	765	1312	799
		310	11998	7979	718	1101	527
		315	9587	7797	636	1794	697
		320	10078	5633	593	1788	605
		325	10455	6482	651	1671	495
		330	12533	7587	668	1351	622
		335	9775	9225	662	1362	708
		340	12626	6903	768	1236	722
		345	11465	6894	551	890	422
		350	8201	6906	484	951	722
		355	8900	10750	586	1489	690
		360	13287	8177	685	1288	864
		365	11004	11423	723	1397	809
		370	11157	6458	656	1550	590
		375	13997	11562	740	1368	955
		380	8100	8711	520	1626	568
		385	10532	13818	643	1427	1106
		390	8767	16270	545	1110	1228
		395	9183	13801	736	1679	678
		400	8275	14408	486	1526	789
		405	13047	13884	683	1146	938
		410	9957	9361	642	1059	873
		415	7402	10925	545	1136	702
		420	7715	21823	579	1706	1033
		425	6614	15208	563	2372	1000
		430	5547	16403	387	1753	781
		435	6360	19332	484	2260	1020
		440	5402	15346	501	1737	739
		445	6276	21048	437	2712	821
		446	7452	22293	403	2835	1140
		448	5505	23138	240	3464	969
		450	4542	21394	185	3890	758
		452	5793	27656	126	4372	859
		454	7339	26638	215	3790	1010
		456	5967	24021	167	3567	903
		458	5691	26517	168	3964	855
		460	5207	24420	160	4107	701
		462	5601	27110	162	4606	834
		464	6206	24640	221	4879	871
		466	6233	27624	155	4292	828
		468	7739	31896	221	4142	831
		470	8889	32859	277	3605	768
		472	9160	27691	317	3332	908
		474	8615	24063	367	3324	935
		476	7826	18215	289	2737	884
		478	10054	23526	382	3329	1257
		480	10066	32422	314	3271	1167
		482	10472	33033	294	2999	1064
		484	10591	32620	256	3112	1453
		486	10003	33547	278	3279	1263
		488	10581	34674	348	3265	1555
		490	10148	33830	347	3236	1695
		492	10618	30359	395	3541	1786
		494	8272	23536	363	3463	1679
		496	7876	22764	308	3922	1211
		498	6818	26466	212	3837	805
		500	6911	29040	204	4006	823
		502	7769	30690	208	4284	1050
		504	8067	28899	248	4367	1041
		506	9404	31590	178	4019	947
		508	10003	33798	213	4191	964
		510	10323	33098	230	3493	1254
		512	11183	32306	362	3861	1419
		514	13480	24795	462	3642	1135
		516	15220	18994	673	2869	1055
		518	17066	16103	701	2357	1104
		520	16736	14065	820	1961	897
		522	13103	18941	741	2177	917
		524	11792	15474	440	1530	622
		526	5487	11703	239	1257	907
		528	7605	24112	225	2136	749
		530	8753	30168	191	2414	835
		532	9230	38284	236	2861	693
		534	9481	37169	226	3096	744
		536	10129	38621	210	3446	854
		538	11459	40946	203	3400	961
		540	12596	44540	209	2979	964
		542	14354	51156	243	2617	916
		544	14288	51281	273	2804	916
		546	11924	45391	243	3197	805
		548	10086	39071	171	3543	675
		550	8574	33060	150	3500	884
		552	9248	35267	141	3961	738
		554	8851	34338	129	3491	721
		556	8775	35893	136	3575	677
		558	9028	36382	139	3520	631
		560	9045	37272	179	3564	667
		562	9189	36763	140	3413	669
		564	8919	35799	197	3454	661
		566	9354	36826	173	3703	652
		568	9541	36324	184	3633	581
		570	8529	33638	137	3497	646
		572	7322	28846	126	3158	674
		574	7217	27981	108	2960	596
		576	8341	32942	152	3349	605
		578	8499	32393	147	3499	730
		580	8373	31604	135	3508	637
		582	8283	31395	149	3525	594
		584	8814	33178	142	3415	748
		586	8375	31859	145	3541	645
		588	8454	32435	162	3474	605
		590	8436	30867	140	3515	624
		592	7821	29737	145	3486	596
		594	7959	29298	112	3636	652
		596	7881	29826	104	3429	524
		598	7542	27733	105	3129	593
		600	7003	25868	122	3045	682
		602	7073	27300	132	3350	632
		604	7758	29714	161	3407	658
		606	7865	29550	144	3440	549
		608	7934	30115	145	3587	553
		610	8373	30728	140	3560	537
		612	7649	29609	126	3481	622
		614	7997	30355	141	3494	642
		616	7977	29334	106	3586	673
		618	7726	30030	126	3486	781
		620	7886	30555	126	3579	739
		622	7882	29220	165	3870	871
		624	6945	25710	110	3622	814
		626	6401	23401	115	3243	707
		628	7958	29090	143	3563	779
		630	8016	28713	146	3886	785
		632	8423	28863	158	4127	960
		634	8923	27969	222	4552	1654
		636	9742	28564	208	5000	1914
		638	12139	28271	312	5714	2068
		640	10612	21797	278	3839	1371
		642
		644
		646
		648	6632	13137	178	2885	944
		650	9408	18726	298	3608	1788
		652	8609	18399	248	3300	1333
		654	9993	18443	295	3358	972
		656	11354	21344	360	3452	1207
		658	11145	22977	348	3386	2019
		660	10669	21225	361	3257	2264
		662	9933	22983	358	3183	2309
		664	9403	26473	260	3256	1592
		666	10083	37211	305	3296	2201
		668	7937	32689	265	3364	1440
		670	7111	26800	243	3485	1138
		672	6830	30815	171	3922	862
		674	6710	28639	151	3879	815
		676	8440	29761	155	3843	748
		678	8737	36001	174	3682	704
		680	9721	41838	183	3106	998
		682	11657	47361	275	2824	1443
		684	11511	41481	271	3271	1640
		686	11321	38452	305	3505	1836
		688	10237	33175	363	3550	1983
		690	7968	26672	303	3667	1672
		692	5254	22634	174	3953	897
		694	5632	25487	140	4310	805
		696	6960	29385	172	4469	813
		698	8767	32994	229	4112	1203
		700	7179	30814	208	4075	1286
		702	7089	30250	176	4144	872
		704	7362	31859	151	4365	803
		706	7814	31479	127	4372	935
		708	8679	32309	150	3953	783
		710	8840	31401	184	3606	668
		712	9536	34605	179	3796	843
		714	8593	30823	211	4437	1199
		716	6541	26766	153	4259	901
		718	8567	29827	181	4537	947
		720	10747	32126	376	4733	1390
		722	12321	24094	557	2900	1087
		724	13469	17070	626	2424	1352
		726	13605	13423	637	1822	652
		728	8602	13443	388	1685	593
		730	5791	15056	235	2159	606
		732	5272	24212	124	4076	639
		734	6333	28949	157	4366	803
		736	7967	32083	188	4590	913
		738	7211	28657	170	4016	952
		740	9594	39426	207	4174	1080
		742	8854	33598	264	3903	1162
		744	9832	39486	213	3761	1196
		746	10269	40879	269	3404	1413
		748	10369	39897	335	3708	1661
		750	8453	34594	234	4081	1373
		752	8726	29030	245	3938	1832
		754	9885	26003	359	3200	1721
		756	7627	24901	292	3169	1522
		758	8205	30484	201	3994	1141
		760	8291	31386	174	4228	842
		762	8875	33200	179	3686	1079
		764	10287	37352	221	3827	1016
		766	8743	32774	201	4010	985
		768	8346	32841	225	3668	990
		770	9174	34027	182	3894	939
		772	10204	38641	200	3723	1035
		774	11230	39472	236	3421	1204
		776	9937	36038	199	3586	1166
		778	10142	38131	214	3655	1089
		780	10305	35812	192	4257	1120
		782	10746	36896	200	3890	1183
		784	9152	33749	222	3911	940
		786	10129	36977	187	4066	1097
		788	8872	33848	211	3558	1016
		790	8244	34110	206	3489	892
		792	8202	32831	178	3294	1196
		794	8774	32824	186	3578	1157

## Sheet: S4 XRD
		Sample ID	Core Depth (mm)	Feldspar %	Quartz %
		CHR17-5-PS-1	15	20.8019	35.9381
		CHR17-5-PS-2	52	30.706	52.924
		CHR17-5-PS-3	93	24.415	20.335
		CHR17-5-PS-4	118	9.91486	40.7751
		CHR17-5-PS-5	138	5.41351	9.38649
		CHR17-5-PS-6	175	13.6482	41.3518
		CHR17-5-PS-7	199	34.1197	34.2203
		CHR17-5-PS-8	220	21.5841	27.4859
		CHR17-5-PS-9	250	1.72424	9.70576
		CHR17-5-PS-10	265	10.7799	34.9501
		CHR17-5-PS-11	289	25.5663	29.1637
		CHR17-5-PS-12	310	37.4409	34.9391
		CHR17-5-PS-13	343	14.3283	65.0617
		CHR17-5-PS-14	396	11.9231	77.1369
		CHR17-5-PS-15	453	19.0862	55.7938
		CHR17-5-PS-16	482	8.52731	35.6027
		CHR17-5-PS-17	514	28.4117	32.9383
		CHR17-5-PS-18	543	5.97425	35.8658
		CHR17-5-PS-19	564	8.86757	39.5824
		CHR17-5-PS-20	584	9.03737	37.7226
		CHR17-5-PS-21	604	9.1966	37.1034
		CHR17-5-PS-22	625	3.53727	35.4127
		CHR17-5-PS-23	645	7.60679	31.5132
		CHR17-5-PS-24	666	4.97984	35.8402
		CHR17-5-PS-25	686	13.4186	44.2314
		CHR17-5-PS-26	698	16.298	28.632
		CHR17-5-PS-27	715	12.5929	36.4471
		CHR17-5-PS-28	727	17.3658	23.2242
		CHR17-5-PS-29	748	14.5661	27.3939
		CHR17-5-PS-30	768	11.116	31.334
		CHR17-5-PS-31	788	2.27708	44.0729
		CHR17-5-PS-32	809	11.2063	37.6537

## Sheet: S5 TOC-TN-δ13C-δ15N
	Sample ID	Core Depth (mm)	δ15N (‰)	δ13C (‰)	TN %	TOC %	TOC/TN
	5-PS-1	15	4.6366	-20.2964	0.0342696	0.278872	8.13759
	5-PS-2	52
	5-PS-3	93	4.0136	-19.4754	0.0692465	0.565254	8.16292
	5-PS-4	118	5.0146	-19.6714	0.0203836	0.225366	11.0563
	5-PS-5	138	3.7076	-20.0084	0.00617244	0.0663601	10.751
	5-PS-6	175	3.3676	-19.7984	0.00929789	0.0932068	10.0245
	5-PS-7	199
	5-PS-8	220	3.6796	-19.5084	0.0549273	0.472601	8.60411
	5-PS-9	250	4.8356	-19.4174	0.00894587	0.0767974	8.58468
	5-PS-10	265	4.3896	-19.3984	0.0347933	0.295301	8.4873
	5-PS-11	289	2.8846	-19.4604	0.0559548	0.482332	8.62003
	5-PS-12	310	2.7376	-21.7644	0.00660911	0.0780916	11.8158
	5-PS-13	343
	5-PS-14	396
	5-PS-15	453	3.6826	-20.8094
	5-PS-16	482	3.8546	-19.4674	0.069992	0.550124	7.85982
	5-PS-17	514	5.0696	-20.2694	0.0141735	0.109435	7.72108
	5-PS-18	543	4.0836	-19.3444	0.039988	0.357544	8.94126
	5-PS-19	564	4.2766	-19.0974	0.0203367	0.208305	10.2428
	5-PS-20	584	3.3936	-19.7654	0.0208853	0.185645	8.88876
	5-PS-21	604	5.2296	-19.4894	0.0189017	0.16318	8.63311
	5-PS-22	625	5.2546	-19.3004	0.0220965	0.181554	8.21639
	5-PS-23	645	3.6416	-19.5834	0.0203468	0.17754	8.72572
	5-PS-24	666	2.9796	-20.0864	0.0183986	0.169428	9.20873
	5-PS-25	686
	5-PS-26	698	1.9256	-19.2914	0.062098	0.540316	8.70103
	5-PS-27	715	3.5366	-19.3434	0.0566275	0.484712	8.55965
	5-PS-28	727	2.3246	-19.4244	0.0916977	0.786475	8.57682
	5-PS-29	748	4.7336	-19.3854	0.0254347	0.208872	8.21209
	5-PS-30	768	3.8756	-19.3424	0.0829177	0.691144	8.3353
	5-PS-31	788	3.0836	-19.8094	0.0357069	0.319475	8.94715
	5-PS-32	809	2.4586	-19.5614	0.0432606	0.392078	9.06318

## Sheet: S6 Salinity δ18O-δ2H
	Sample ID	Salinity (PSU)	δ18O (‰)	δ2H (‰)
	GoA, 500 m above seawater-brine interface (Replicate #1)	43	1.8906	13.8519
	GoA, 500 m above seawater-brine interface (Replicate #2)	43	1.6531	13.607
	GoA, 500 m above seawater-brine interface (Replicate #3)	43	1.50351	13.6077
	Brine pool, 2 m beneath seawater-brine interface (Replicate #1)	160	0.857491	7.2153
	Brine pool, 2 m beneath seawater-brine interface (Replicate #2)	160	1.3781	8.18898
	Brine pool, 2 m beneath seawater-brine interface (Replicate #3)	160	1.05815	7.75693
